# Supplementary material for: Architecting a National Marine Spatial Data Infrastructure: A Tiered, Adaptive Strategy for Translating Diagnostic Gaps into Executive Action
Source: Research Square preprint supplement (doi:10.21203/rs.3.rs-8491761/v1), 2026-01-28
Supplement: Supplementary file 1 [file 4c9ff7f3dcfdb47b6ee762d6.docx]

**Supplementary file: S5 – Robustness Analysis**

| **Metric** | **Value** |
| --- | --- |
| N | 13 |
| K | 10 |
| Spearman rho divmax | 0.978021978 |
| TopK overlap divmax | 9 |
| Avg |Δrank| divmax | 0.461538462 |
| Count |Δrank|>2 divmax | 0 |
| Spearman rho wins | 0.994505495 |
| TopK overlap wins | 10 |
| Avg |Δrank| wins | 0.153846154 |
| Count |Δrank|>2 wins | 0 |
