# Supplementary material for: Architecting a National Marine Spatial Data Infrastructure: A Tiered, Adaptive Strategy for Translating Diagnostic Gaps into Executive Action
Source: Research Square preprint supplement (doi:10.21203/rs.3.rs-8491761/v1), 2026-01-28
Supplement: Supplementary file 2 [file 555f641309cae7863f6aa801.docx]

**Supplementary file: S2 - Benchmarking Likert Mean Median IQR**

**Table 1: Raw Data**

| **Gap_ID** | **Count 1** | **Count 2** | **Count 3** | **Count 4** | **Count 5** | **N** |
| --- | --- | --- | --- | --- | --- | --- |
| G01 | 0 | 0 | 3 | 24 | 35 | 62 |
| G02 | 1 | 1 | 3 | 20 | 37 | 62 |
| G03 | 0 | 1 | 3 | 27 | 31 | 62 |
| G04 | 2 | 2 | 7 | 26 | 25 | 62 |
| G05 | 6 | 7 | 12 | 20 | 17 | 62 |
| G06 | 7 | 5 | 14 | 17 | 19 | 62 |
| G07 | 5 | 3 | 5 | 27 | 22 | 62 |
| G08 | 5 | 8 | 18 | 19 | 12 | 62 |
| G09 | 4 | 8 | 9 | 23 | 18 | 62 |
| G10 | 12 | 13 | 16 | 12 | 9 | 62 |
| G11 | 2 | 4 | 19 | 19 | 18 | 62 |
| G12 | 9 | 9 | 19 | 10 | 15 | 62 |
| G13 | 1 | 7 | 18 | 15 | 21 | 62 |

**Table 2: Mean – Median – IQR**

| **Gap_ID** | **Mean Likert** | **Mean Normalization** | **Median Cat** | **Q1 Cat** | **Q3 Cat** | **IQR** |
| --- | --- | --- | --- | --- | --- | --- |
| G01 | 4.516129032 | 0.879032258 | 4 | 3 | 4 | 1 |
| G02 | 4.467741935 | 0.866935484 | 4 | 3 | 4 | 1 |
| G03 | 4.419354839 | 0.85483871 | 4 | 3 | 4 | 1 |
| G04 | 4.129032258 | 0.782258065 | 3 | 3 | 4 | 1 |
| G05 | 3.564516129 | 0.641129032 | 3 | 2 | 4 | 2 |
| G06 | 3.580645161 | 0.64516129 | 3 | 2 | 4 | 2 |
| G07 | 3.935483871 | 0.733870968 | 3 | 3 | 4 | 1 |
| G08 | 3.403225806 | 0.600806452 | 3 | 2 | 3 | 1 |
| G09 | 3.693548387 | 0.673387097 | 3 | 2 | 4 | 2 |
| G10 | 2.887096774 | 0.471774194 | 2 | 1 | 3 | 2 |
| G11 | 3.758064516 | 0.689516129 | 3 | 2 | 4 | 2 |
| G12 | 3.209677419 | 0.552419355 | 2 | 1 | 4 | 3 |
| G13 | 3.774193548 | 0.693548387 | 3 | 2 | 4 | 2 |
