# Supplementary material for: Architecting a National Marine Spatial Data Infrastructure: A Tiered, Adaptive Strategy for Translating Diagnostic Gaps into Executive Action
Source: Research Square preprint supplement (doi:10.21203/rs.3.rs-8491761/v1), 2026-01-28
Supplement: Supplementary file 3 [file 84cfcc94bc7ced93951893ae.docx]

**Supplementary file: S4 – Stability Analysis Results**

| **Metric** | **Value** |
| --- | --- |
| N | 13 |
| K | 10 |
| Spearman rho low | 0.994505495 |
| TopK overlap low | 10 |
| Avg |Δrank| low | 0.153846154 |
| Count |Δrank|>2 low | 0 |
| Spearman rho high | 0.994505495 |
| TopK overlap high | 10 |
| Avg_|Δrank| high | 0.153846154 |
| Count |Δrank|>2 high | 0 |
