# Supplementary material for: Architecting a National Marine Spatial Data Infrastructure: A Tiered, Adaptive Strategy for Translating Diagnostic Gaps into Executive Action
Source: Research Square preprint supplement (doi:10.21203/rs.3.rs-8491761/v1), 2026-01-28
Supplement: Supplementary file 4 [file aa02ff4df3f981820ca6af43.docx]

**Supplementary File: S3 - Sensitivity Analysis Results**

**Table 1: Metrics**

| **Metric** | **Value** |
| --- | --- |
| N | 13 |
| K (Top-K) | 10 |
| Spearman rho (Baseline vs Scenario) | 0.978021978 |
| TopK overlap | 10 |
| Avg |Δrank| | 0.461538462 |
| Count |Δrank|>2 | 0 |

**Table 2: Top K (Baseline Vs Scenario)**

| **Top-K (Baseline)** | | **Top-K (Scenario)** | |
| --- | --- | --- | --- |
| Rank | Gap_ID | Rank | Gap_ID |
| 1 | G-001 | 1 | G-001 |
| 2 | G-002 | 2 | G-002 |
| 3 | G-003 | 3 | G-006 |
| 4 | G-007 | 4 | G-003 |
| 5 | G-006 | 5 | G-007 |
| 6 | G-004 | 6 | G-011 |
| 7 | G-011 | 7 | G-004 |
| 8 | G-013 | 8 | G-013 |
| 9 | G-009 | 9 | G-009 |
| 10 | G-008 | 10 | G-008 |
