# Supplementary material for: Architecting a National Marine Spatial Data Infrastructure: A Tiered, Adaptive Strategy for Translating Diagnostic Gaps into Executive Action
Source: Research Square preprint supplement (doi:10.21203/rs.3.rs-8491761/v1), 2026-01-28
Supplement: Supplementary file 5 [file ec09b1b5e0b352337bf58c41.docx]

**Supplementary File: S1 - National stakeholders Maturity Weighted Gap**

| **Gap ID** | **Mentions H** | **Mentions M** | **Mentions E** | **Weighted Freq** | **FreqNorm 0to1** |
| --- | --- | --- | --- | --- | --- |
| G-001 | 29 | 24 | 14 | 51.4 | 1 |
| G-002 | 30 | 18 | 13 | 47.8 | 0.90296496 |
| G-003 | 14 | 32 | 10 | 40.4 | 0.703504043 |
| G-004 | 18 | 13 | 12 | 31.9 | 0.474393531 |
| G-005 | 7 | 15 | 17 | 24.3 | 0.269541779 |
| G-006 | 21 | 22 | 19 | 44 | 0.800539084 |
| G-007 | 23 | 23 | 8 | 42.3 | 0.754716981 |
| G-008 | 19 | 10 | 7 | 28.8 | 0.39083558 |
| G-009 | 7 | 19 | 22 | 29.1 | 0.398921833 |
| G-010 | 11 | 3 | 3 | 14.3 | 0 |
| G-011 | 21 | 20 | 11 | 39.4 | 0.676549865 |
| G-012 | 17 | 9 | 5 | 25.3 | 0.296495957 |
| G-013 | 18 | 17 | 13 | 35.1 | 0.5606469 |
